# Supplementary material
Source: PubMed Central journal article supplement (PMC6395321)
Supplement: 2018_202697-Disclosures_and_Contributions.pdf [file 2018_202697-Disclosures_and_Contributions.pdf]

Haematologica  
HAEMATOL/2018/202697  
Version 4

A gain of function variant in PIEZO1 (E756del) and sickle cell disease

Helen Rooks, John Brewin, Kate Gardner, Subarna Chakravorty,  
Stephan Menzel, Anke Hannemann, John Gibson, and David C. Rees

Disclosures: The authors have no significant conflicts of interest.

Contributions: All authors contributed to writing the paper and approved the final version. Additionally, HR designed the DNA assay for PIEZO1 E756del and analysed the DNA samples. JB and KG analysed the data. SC collected clinical data. SM helped with the DNA analysis and analysed the data. AH measured Psickle activity. JSG helped design the study and Psickle assays. DCR designed the study, helped with the analysis and wrote the manuscript.
